# Supplementary material for: Suppression of Esophageal Squamous Cell Carcinoma Development by Mechanosensitive Protein Piezo1 Downregulation
Source: PubMed Central journal article supplement — ACS Omega. 2021 Apr 12;6(15):10196–206. doi: 10.1021/acsomega.1c00505 (PMC8153669; doi:10.1021/acsomega.1c00505), 2021-04-12
Supplement: ao1c00505_si_001.pdf [file ao1c00505_si_001.pdf]

# Suppression of esophageal squamous cell carcinoma development by mechanosensitive protein Piezo1 downregulation

Lu Gao<sup>1</sup>, Yun Ji<sup>1</sup>, Lulu Wang<sup>1</sup>, Meixia He<sup>1</sup>, Xiaojing Yang<sup>1</sup>, Yibing Qiu<sup>1</sup>, Xu Sun<sup>2</sup>, Zhenyu Ji<sup>1</sup>, Guanrui Yang<sup>1</sup>, Jianying Zhang<sup>1</sup>, Shanshan Li<sup>3</sup>, Liping Dai<sup>1\*</sup>, Liguozhang<sup>1\*</sup>

<sup>1</sup> BGI College & Henan Institute of Medical and Pharmaceutical Sciences, Zhengzhou University, Zhengzhou 450052, China

<sup>2</sup> Integrated TCM and Western Medicine Department, Affiliated Cancer Hospital of Zhengzhou University, Zhengzhou 450008, China

<sup>3</sup> Pathology Department, First Affiliated Hospital of Zhengzhou University, Zhengzhou University, Zhengzhou 450052, China

\* Corresponding author: Liguozhang

E-mail: [lgzhang@zzu.edu.cn](mailto:lgzhang@zzu.edu.cn)

Postal address: Henan Institute of Medical and Pharmaceutical Science, Zhengzhou University, No. 40 Daxue Road, Zhengzhou 450052, China

Tel: 086-17839908382

\* Corresponding author: Liping Dai

E-mail: [lpd@zzu.edu.cn](mailto:lpd@zzu.edu.cn)

Postal address: Henan Institute of Medical and Pharmaceutical Science, Zhengzhou University, No. 40 Daxue Road, Zhengzhou 450052, China

Tel: 086-15290808333

---

Table S1. Genetic sequences

---

| Gene     | Sense                | Antisense               |
|----------|----------------------|-------------------------|
| Bax      | CCCGAGAGGTCTTTTCCG   | TGAGCACCAGTTTGCTGGC     |
| Caspase3 | TGGTTCATCCAGTCGCTTTG | TTCTGTTGCCACCTTTCGG     |
| GAPDH    | GAACGGGAAGCTCACTGG   | GCCTGCTTCACCACCTTCT     |
| p53      | GTTGGTCGGTGGGTGGTAGT | GGGATGGGGTGAGATTCCTT    |
| Piezo1   | GCGACACATAGGGGTCACAA | CAGACAGAGGAGACCACCAAGAT |

---

---

Table S2. Antibodies used in the experiment with dilution ratios

---

| Protein                    | Dilution ratio |
|----------------------------|----------------|
| Bax (CST, USA)             | 1:1000         |
| Caspase3 (CST,USA)         | 1:1000         |
| Cleaved-caspase3 (CST,USA) | 1:1000         |
| GAPDH (CST,USA)            | 1:1000         |
| p53 (CST,USA)              | 1:1000         |
| Piezo1 (Abcam,USA)         | 1:500          |
| E-cadherin (CST,USA)       | 1:1000         |
| N-cadherin (CST,USA)       | 1:1000         |
| Vinculin (CST,USA)         | 1:1000         |

---
